# Supplementary material for: Pan-Arctic surface ozone: modelling vs. measurements
Source: Copernicus journal article supplement (doi:10.5194/acp-20-15937-2020), 2020-12-21
Supplement: Supplementary file 1 [file acp-20-15937-2020-supplement.pdf]

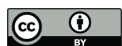

*Supplement of*

## **Pan-Arctic surface ozone: modelling vs. measurements**

**Xin Yang et al.**

*Correspondence to:* Xin Yang (xinyang55@bas.ac.uk)

The copyright of individual parts of the supplement might differ from the CC BY 4.0 License.

## Supplementary Materials

Table S1. A size-dependent non-seasonal SSA bromine depletion factor (DF) derived from previous work of Yang et al. (2008, 2010) and Breider et al. (2009).

| Dry NaCl diameter ( $\mu\text{m}$ ) | DF   |
|-------------------------------------|------|
| <0.4                                | 0.00 |
| 0.64                                | 0.02 |
| 0.9                                 | 0.20 |
| 1.26                                | 0.38 |
| 1.78                                | 0.47 |
| 2.52                                | 0.50 |
| 3.36                                | 0.48 |
| 5.0                                 | 0.43 |
| 7.1                                 | 0.38 |
| 10.0                                | 0.36 |
| >10                                 | 0.00 |

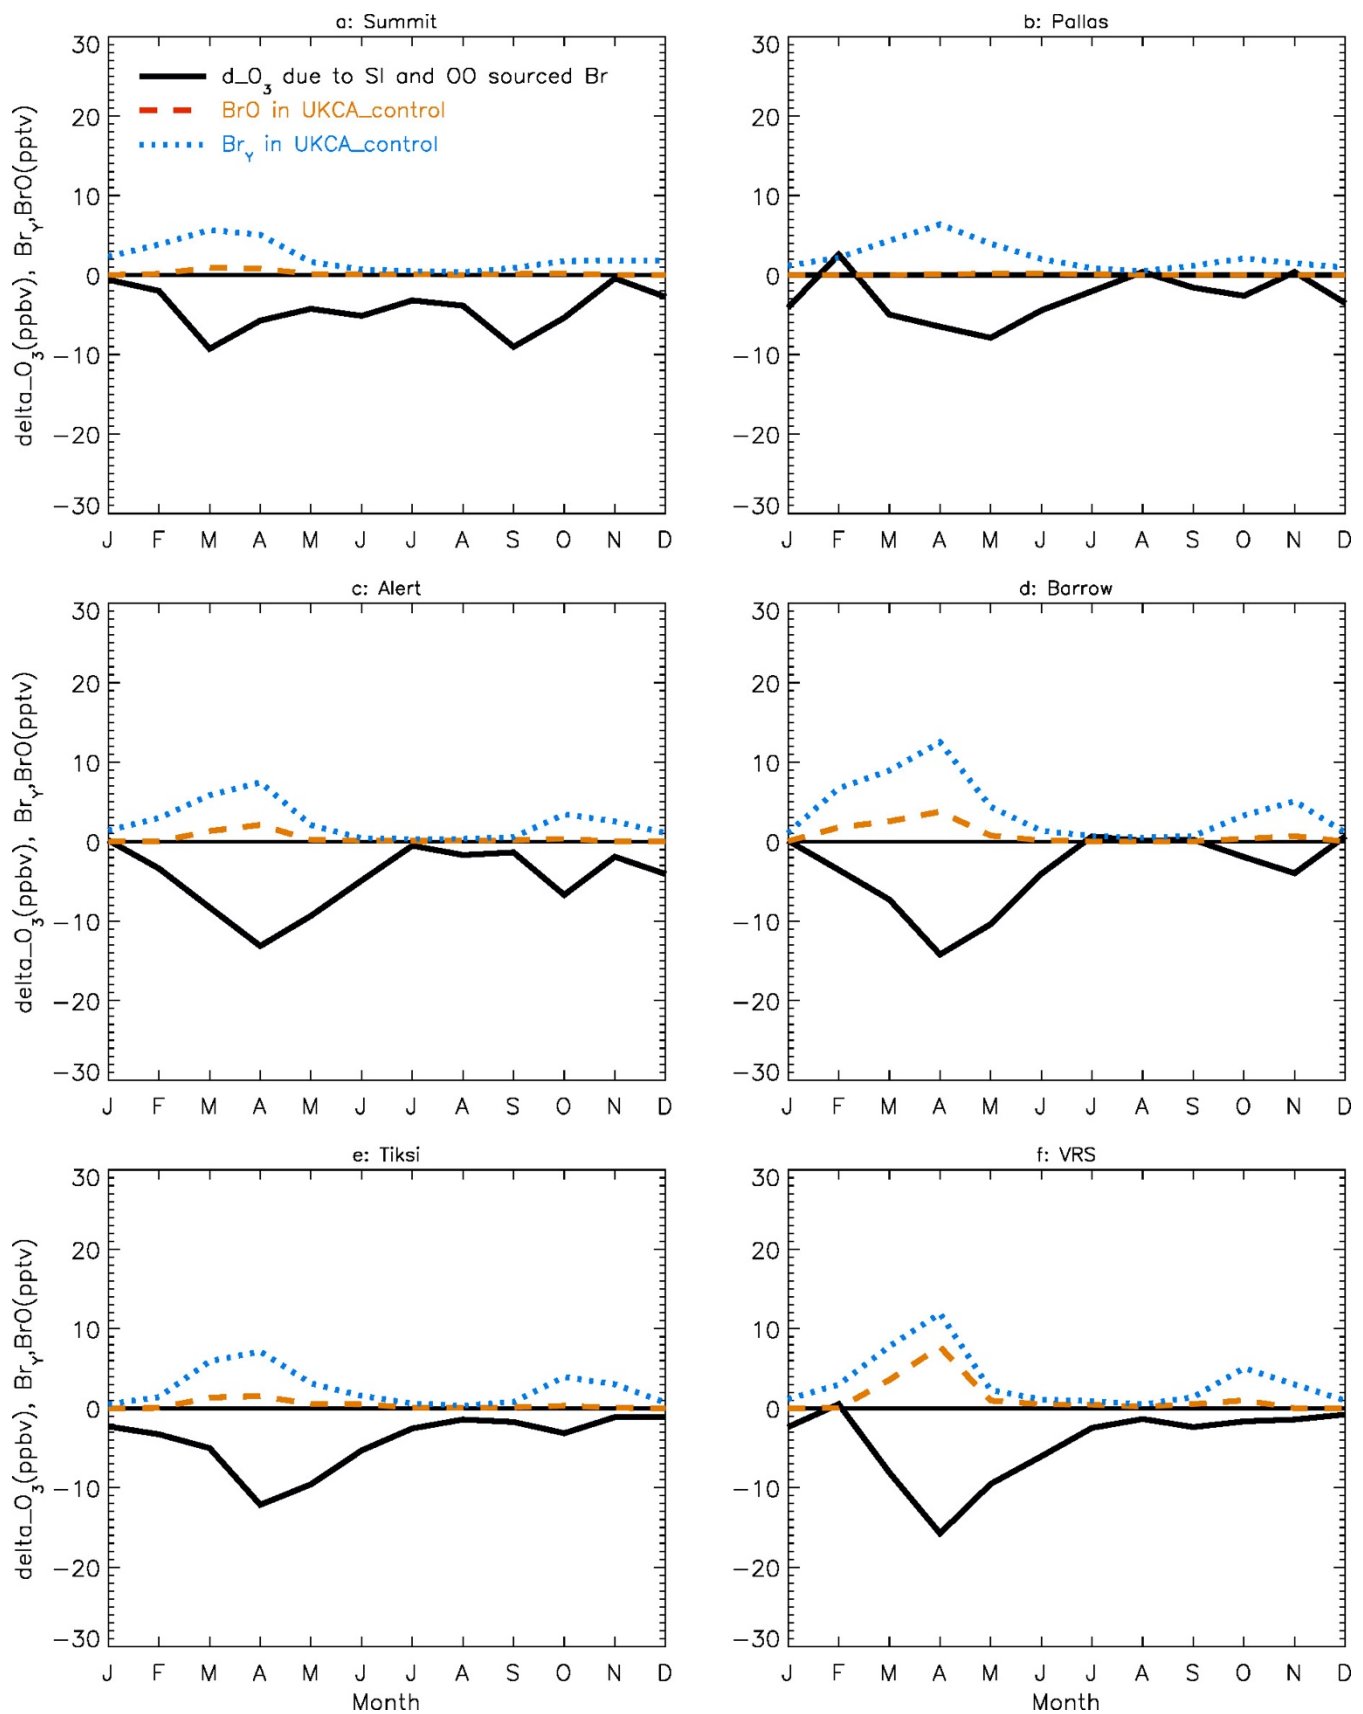

Figure S1: Similar to Fig. 2 but for UKCA model results (averaged from an integration of 2006-2008). Solid black line (=UKCA\_control -UKCA\_VSLS) represents the effect from both SI- and OO-sourced bromine. Total inorganic  $Br_Y$  (dotted blue line) and  $BrO$  (dash orange line) from UKCA\_control are also plotted.

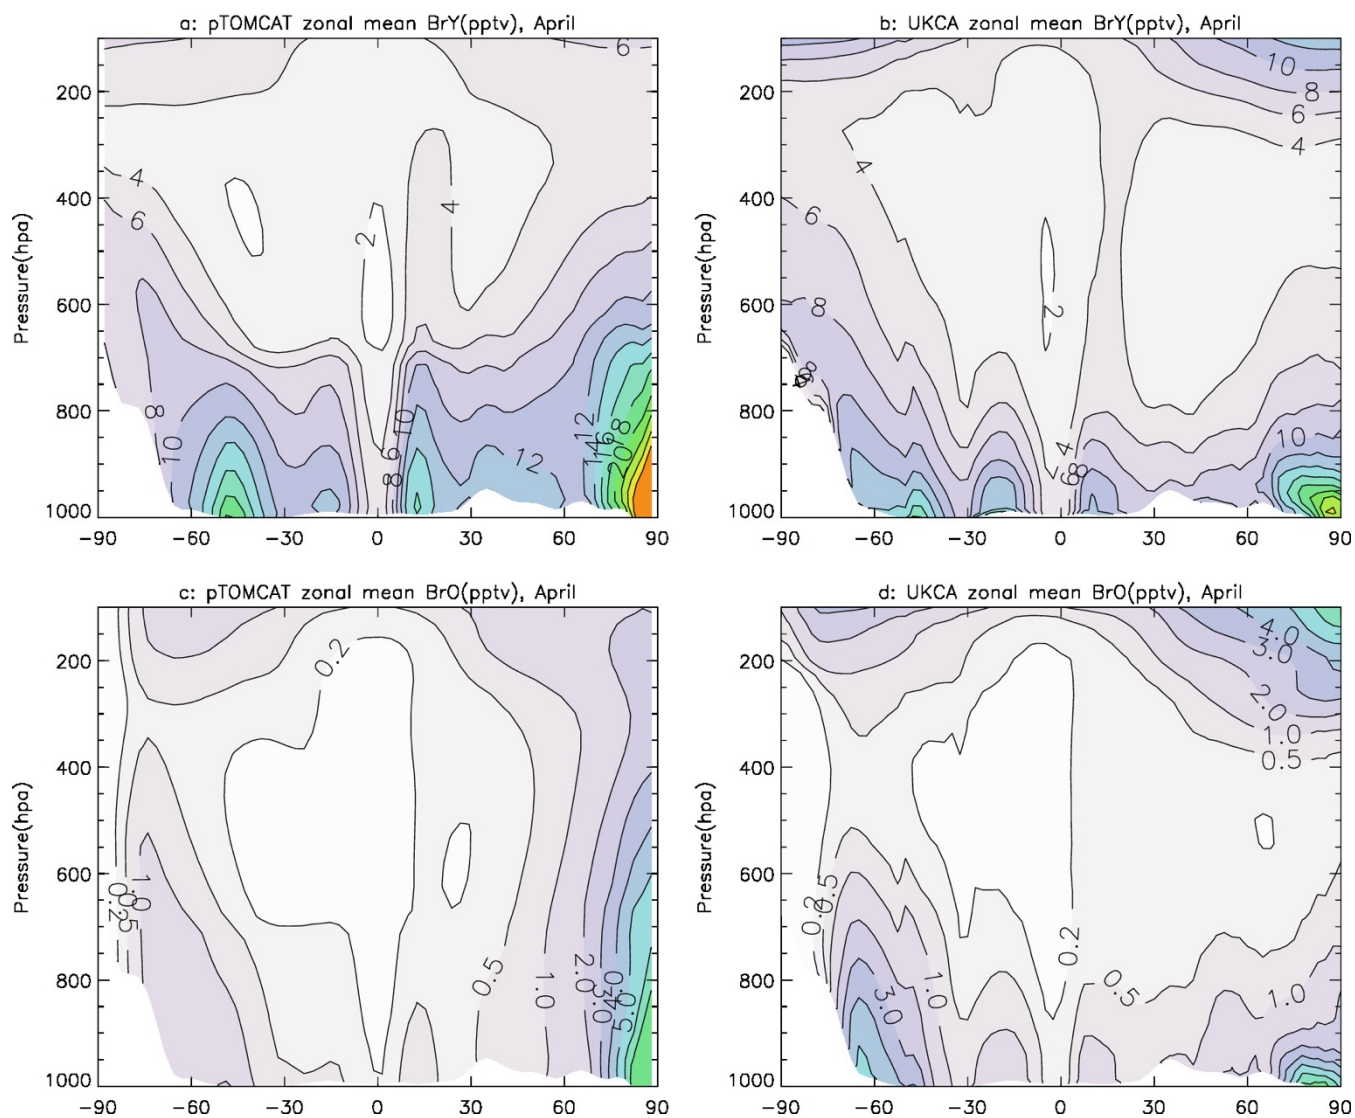

Figure S2: April zonal mean BrY (pptv) (a, c) and BrO (pptv) (b, d) in pTOMCAT\_control run (left) and UKCA\_control run (right), respectively, values are taken from a three-year integration (2007-2009).

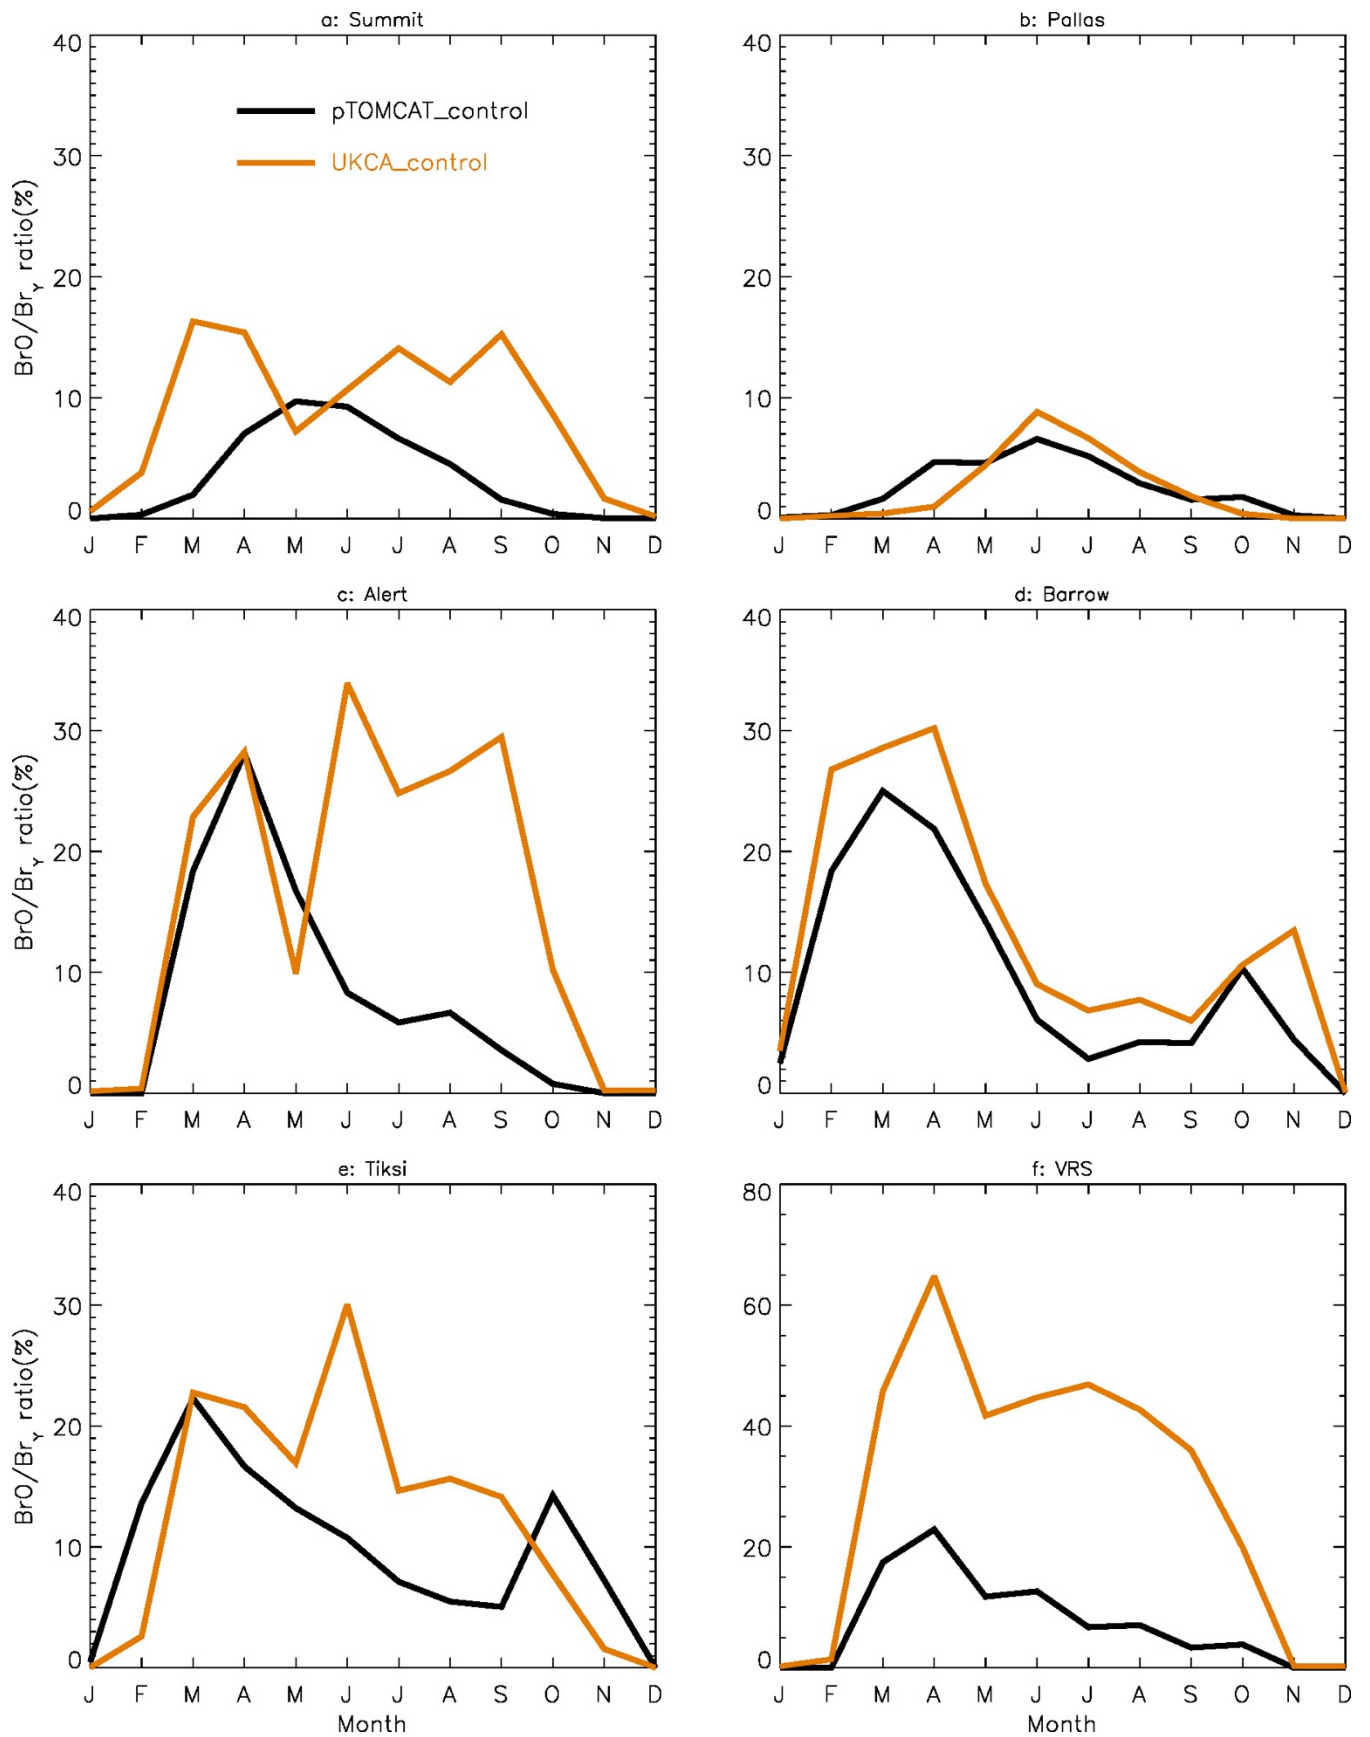

Figure S3: Monthly mean BrO/Br<sub>Y</sub> ratio (in percentage) from pTOMCAT\_control (black line) and UKCA\_SI\_OO\_VSLs (orange line).

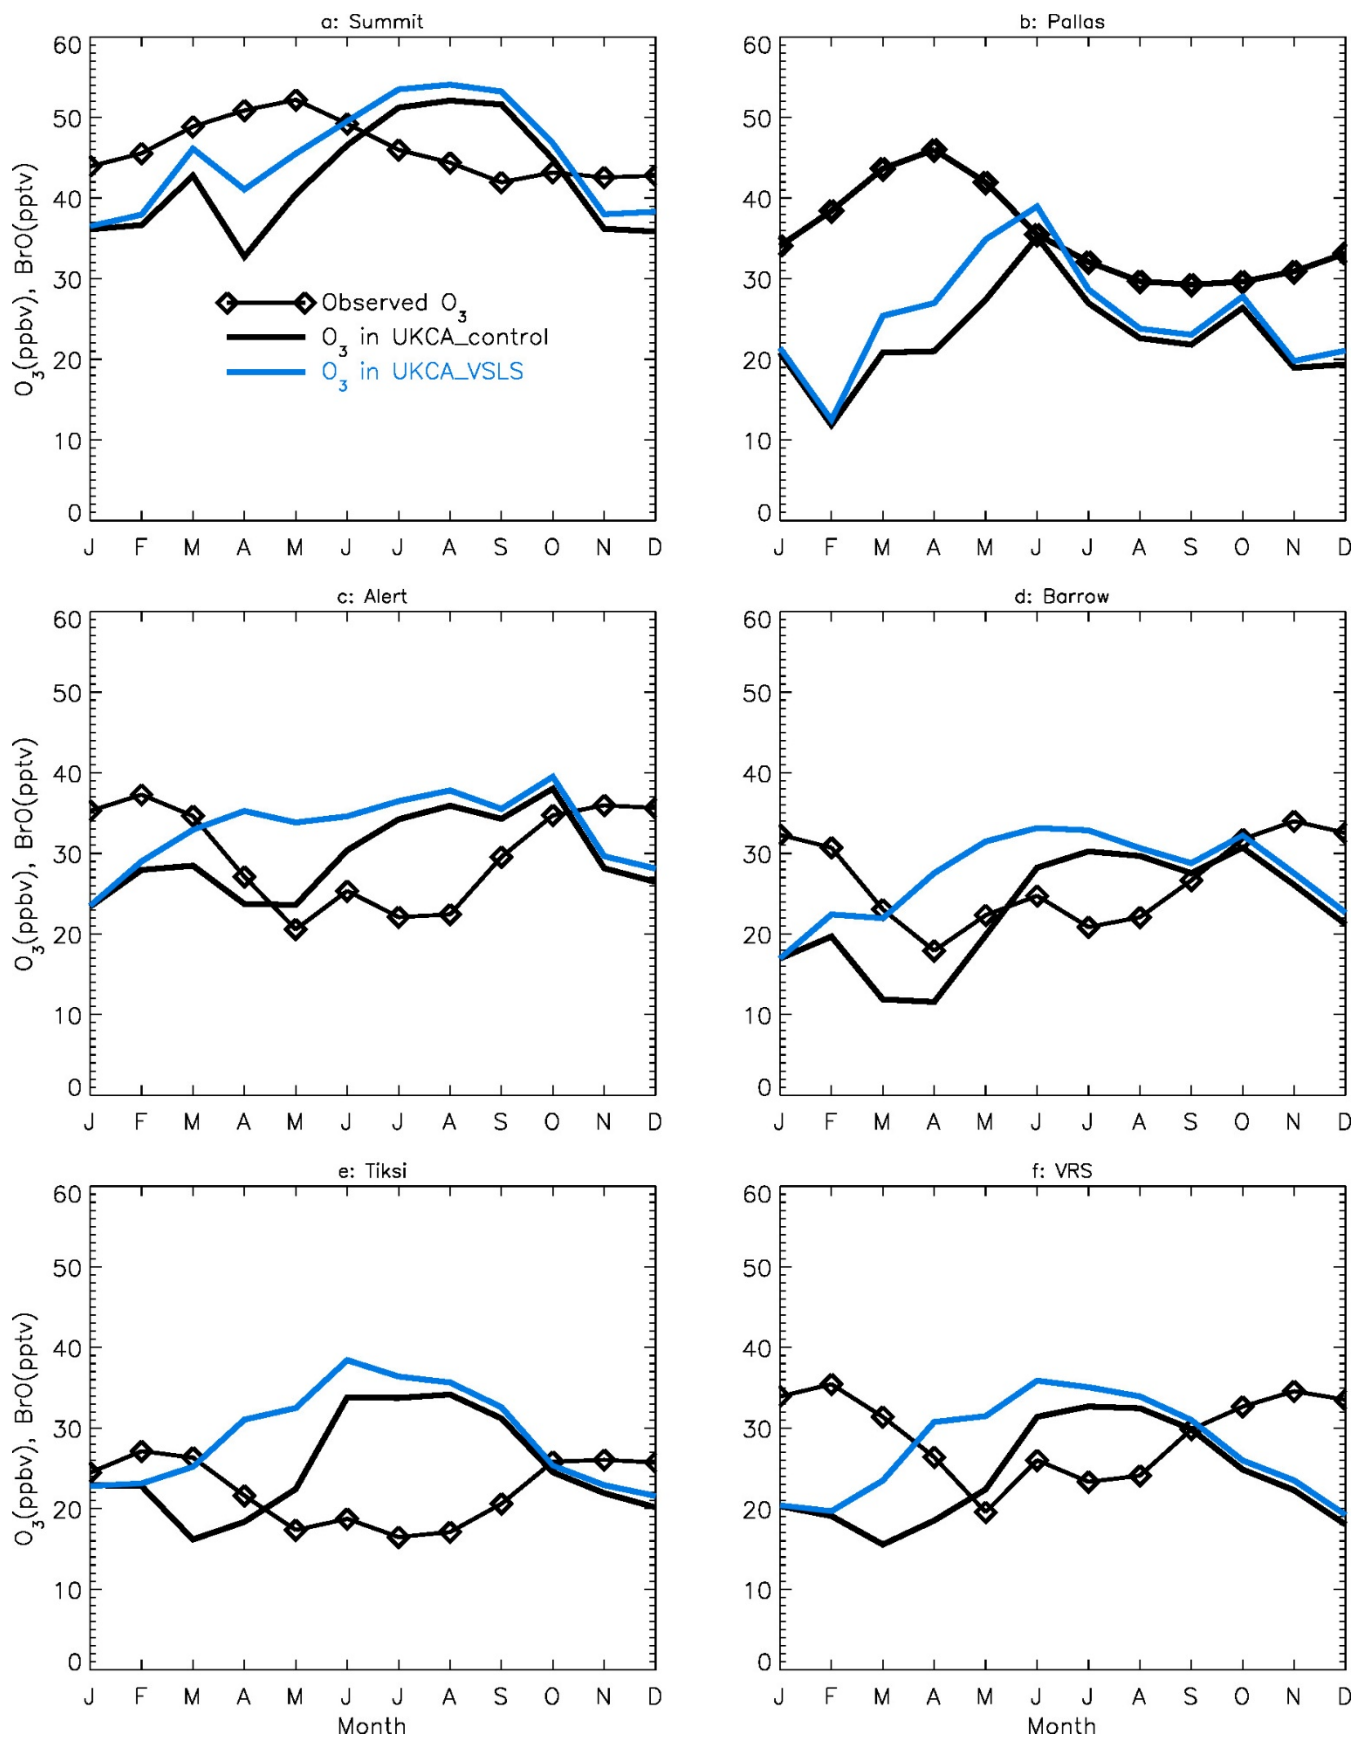

Figure S4: Same as Fig. 2 but for model output from UKCA\_control (black line) and UKCA\_VSLS (blue line).

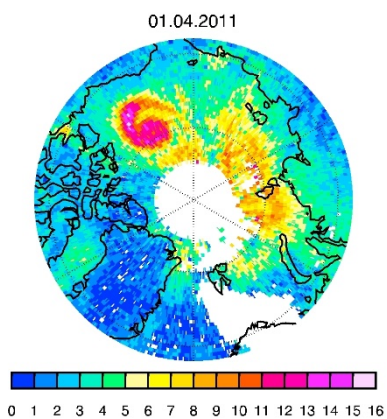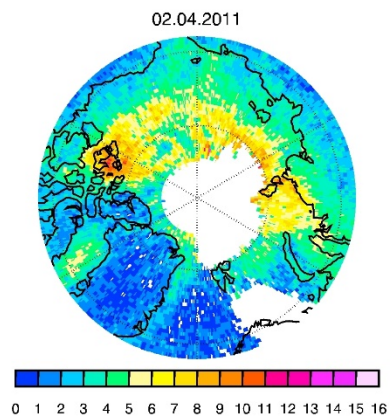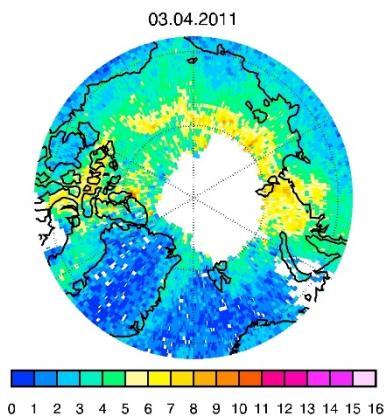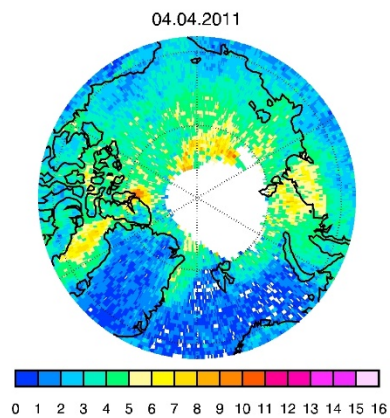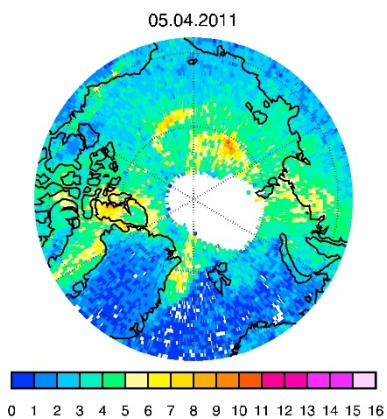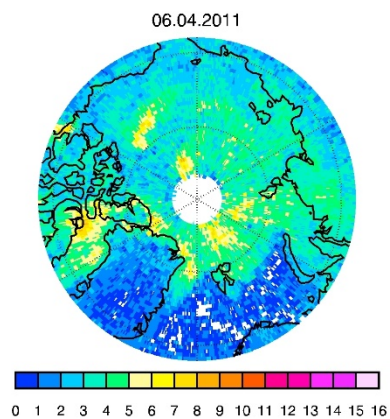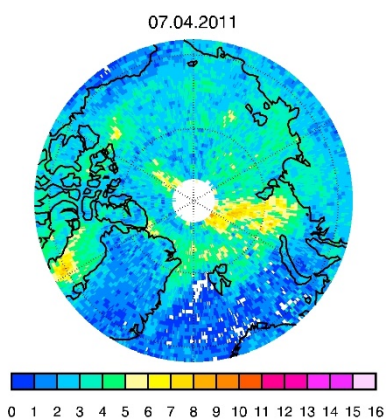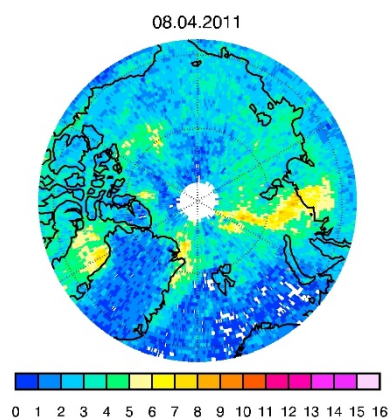

Figure S5: GOME-2 tropospheric vertical column densities of BrO ( $\times 10^{13}$  molecules  $\text{cm}^{-2}$ ) during the time period of 1-8 April 2011.

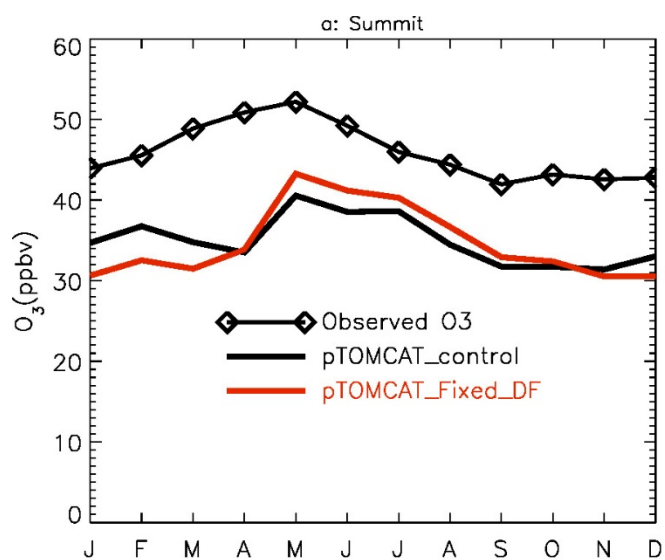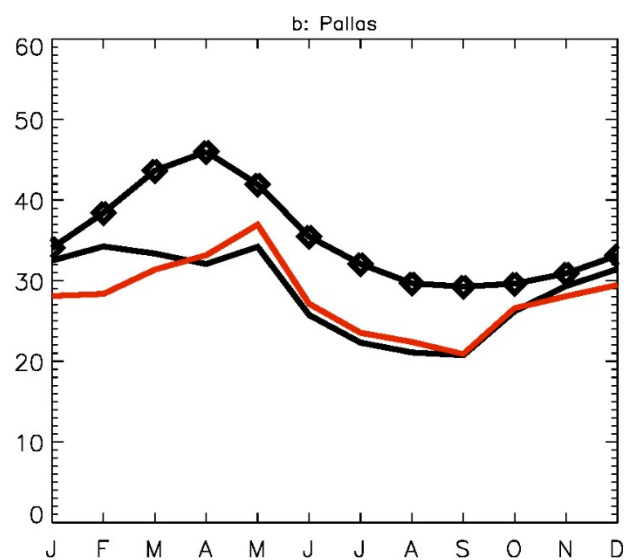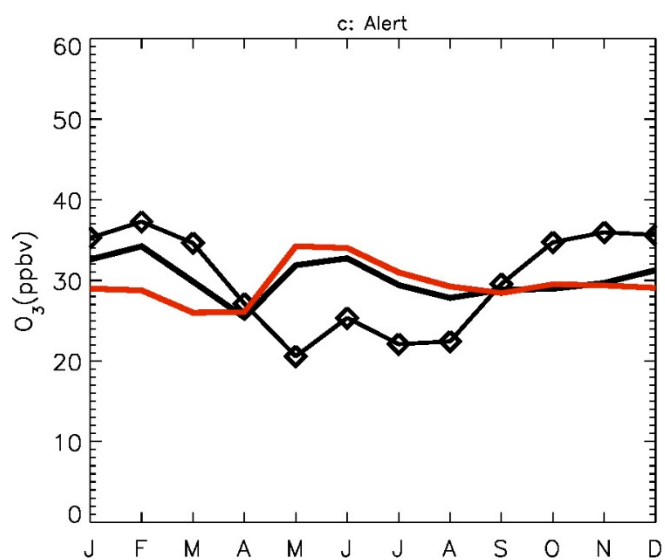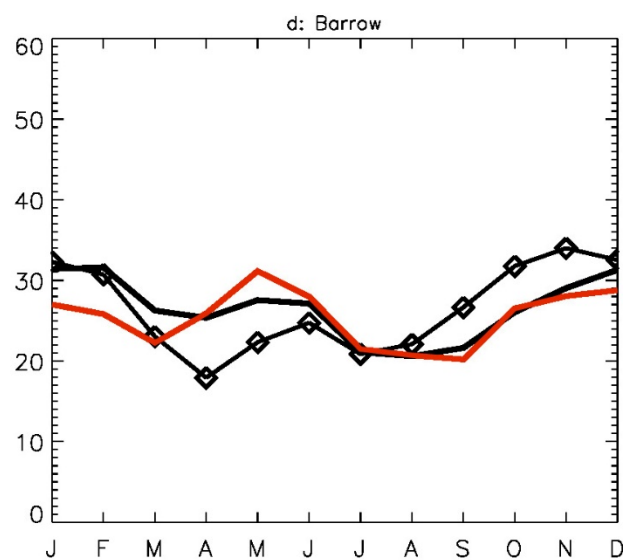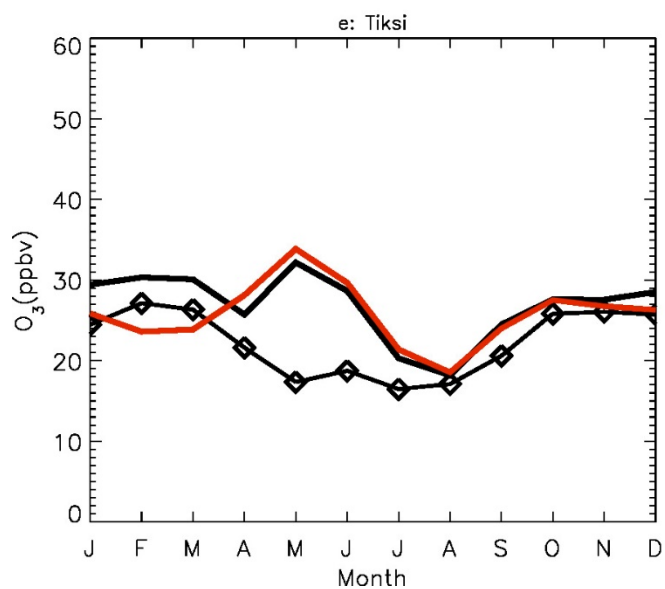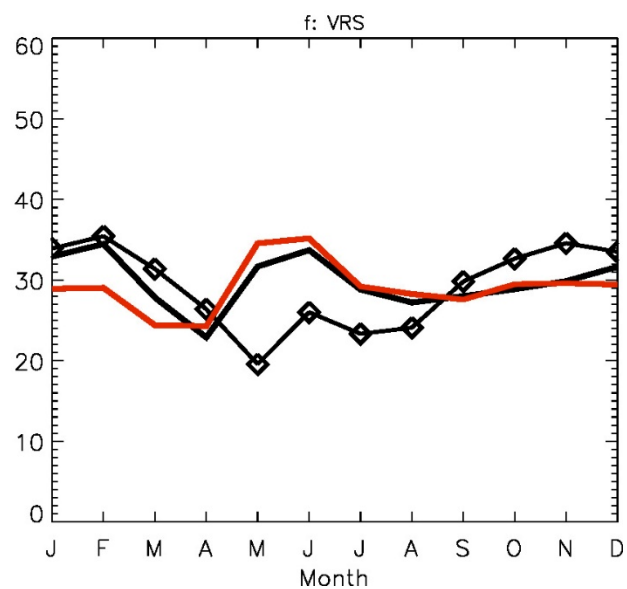

Figure S6: Same as Fig. 2 but for model ozone from pTOMCAT\_Fixed\_DF run (red line). pTOMCAT\_control result is shown in black.

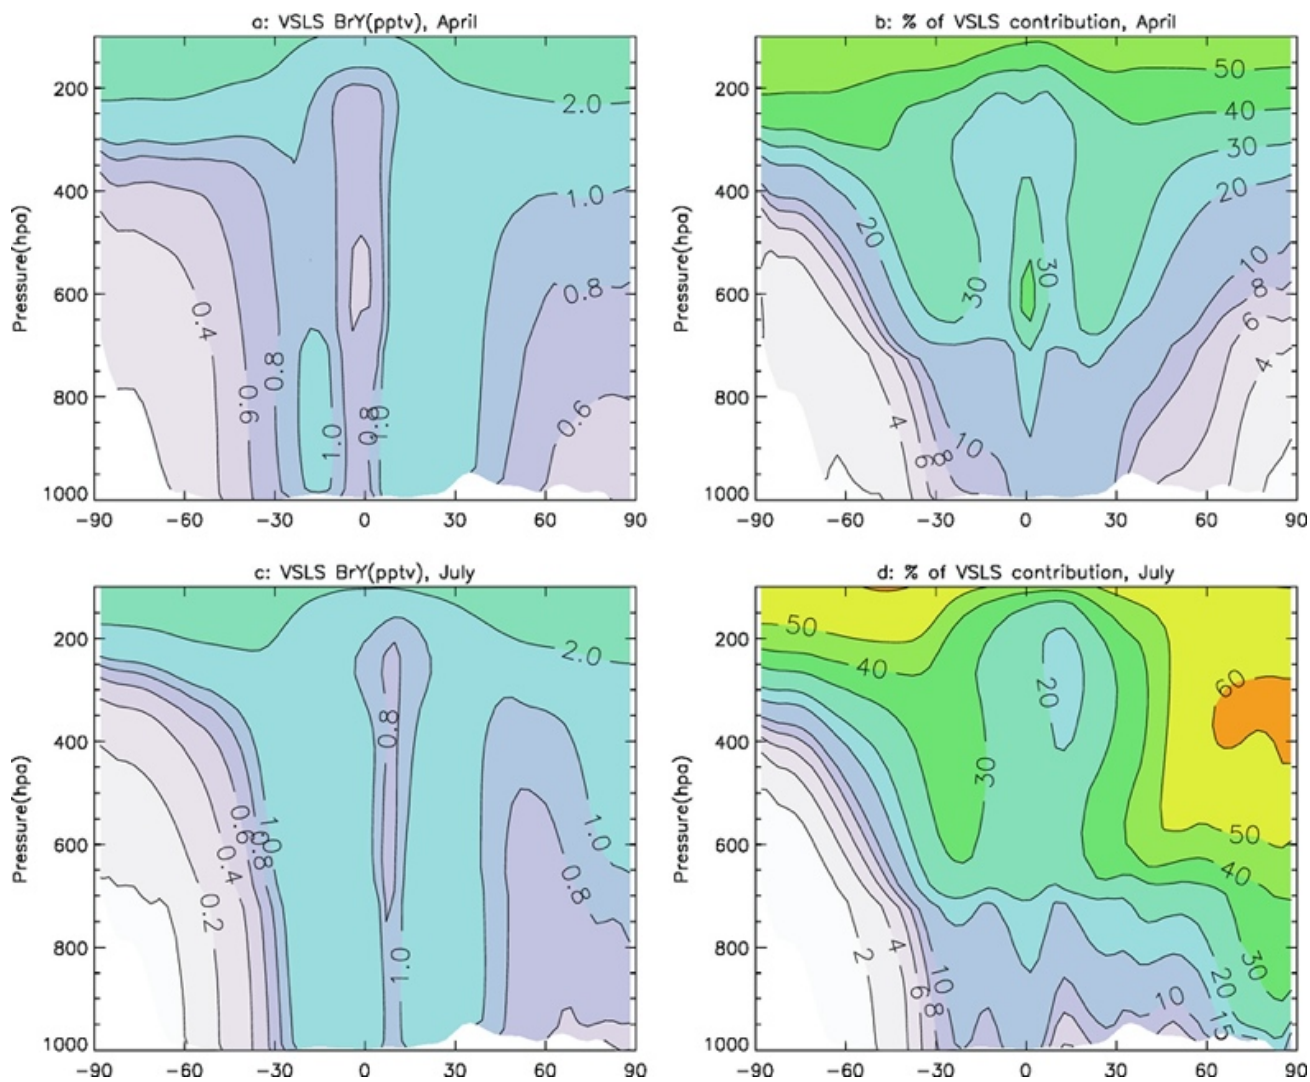

5 Figure S7: Zonal mean of VSLs BrY (pptv) and percentage contribution to total BrY in April (a, b) and July (c, d). Values are from a 3-years p-TOMCAT integration.
